# Supplementary material for: The IRF2BP2-KLF2 axis regulates osteoclast and osteoblast differentiation
Source: PubMed Central journal article supplement — BMB Rep. 2019 Jul 31;52(7):469–74. doi: 10.5483/BMBRep.2019.52.7.104 (PMC6675247; doi:10.5483/bmbrep.2019.52.7.104), 2019-07-31
Supplement: BMB-52-469_Supple.pdf [file BMB-52-469_Supple.pdf]

## **SUPPLEMENTARY INFORMATION**

### **MATERIALS AND METHODS**

.

#### **Osteoclast differentiation**

Bone marrow cells were isolated from the tibiae and femurs of 6-week-old ICR mice by flushing the bone marrow with  $\alpha$ -MEM. Bone marrow cells were cultured in  $\alpha$ -MEM containing 10 % fetal bovine serum (FBS) in the presence of macrophage colony-stimulating factor (M-CSF; 30 ng/ml) for 3 days. The adherent bone marrow-derived macrophages (BMMs) used as osteoclast precursors were cultured with M-CSF (30 ng/ml) and RANKL (20-100 ng/ml) for 3 days. Cultured cells were fixed with 10 % formalin and stained for TRAP solution. TRAP-positive cells with more than three nuclei were counted as osteoclasts.

#### **Osteoblast differentiation**

Primary osteoblast precursor cells were isolated from the calvarial bone of neonatal mice by successive enzymatic digestion with  $\alpha$ -MEM containing 0.1 % collagenase (Thermo Fisher Scientific, Waltham, MA, USA) and 0.2 % dispase II (Roche Diagnostics, Rotkreuz, Switzerland). After removing the enzymes, the collected cells were cultured in osteogenic medium containing BMP2 (100 ng/ml), ascorbic acid (50 ng/ml), and  $\beta$ -glycerophosphate (100 mM). To assess osteoblast differentiation, osteoblast precursor cells cultured for 3 days were subjected to an ALP assay. Briefly, cells were lysed with osteoblast lysis buffer (50 mM Tris-HCl [pH 7.4], 1 % Triton X-100, 150 mM NaCl, and 1 mM EDTA) and the lysates were incubated with p-nitrophenyl phosphate substrate (MilliporeSigma, Burlington, MA, USA). ALP activity was measured as the change in absorbance at 405 nm using a spectrophotometer.

To assess their function, osteoblasts cultured for 9 days were fixed with 70 % ethanol and stained with 40 mM alizarin-red (pH 4.2). Nonspecific staining was removed with PBS, stained alizarin-red was dissolved with 10 % cetylpyridinium chloride (MilliporeSigma), and the absorbance of the extracted solution was measured at 562 nm.

### **Retroviral gene transduction**

Retroviral vectors were transfected into the packaging cell line (Plat E) using FuGENE 6 (Promega, Fitchburg, WI, USA) according to the manufacturer's instructions. Viral supernatants were collected from the culture medium 48 h after transfection. BMMs or osteoblasts were incubated with the viral supernatants for 6 h in the presence of polybrene (10 µg/ml) (MilliporeSigma).

### **Small interfering RNA transfection**

The small interfering RNA (siRNA) sequences used to knock down KLF2: a nonspecific control siRNA (5'-CCU GGC GCC UUC GGU CUU UUU-3') and mouse KLF2-specific siRNA (5'-GCA CGG AUG AGG ACC UAA A-3'). siRNAs were transfected into BMMs and osteoblasts using Lipofectamine 2000 (Thermo Fisher Scientific) according to the manufacturer's protocol.

### **Quantitative real-time PCR analysis**

Total RNA was extracted from the cultured cells using Qiazol lysis reagent (Qiagen, Venlo, Germany) according to the manufacturer's instructions, and 2 µg RNA was reverse transcribed into cDNA using Superscript II Reverse Transcriptase (Thermo Fisher Scientific). Quantitative real-time PCR analysis was performed in triplicate using a Rotor-Gene Q with SYBR Green (Qiagen). The following sequences were used to assess mRNA expression: c-Fos, 5'-ATG GGC

TCT CCT GTC AAC ACA-3' and 5'-TGG CAA TCT CAG TCT GCA ACG CAG-3'; NFATc1, 5'-CTC GAA AGA CAG CAC TGG AGC AT-3' and 5'-CGG CTG CCT TCC GTC TC ATAG-3'; TRAP, 5'-CTG GAG TGC ACG ATG CCA GCG ACA-3' and 5'-TCC GTG CTC GGC GAT GGA CCA GA-3'; GAPDH, 5'-TGA CCA CAG TCC ATG CCATCA CTG-3' and 5'-CAG GAG ACA ACC TGG TCC TCA GTG-3'; Runx2, 5'-CCC AGC CAC CTT TAC CTA CA-3' and 5'-CAG CGT CAA CAC CAT CAT TC-3'; ALP, 5'-CAA GGA TAT CGA CGT GAT CAT G-3' and 5'-GTC AGT CAG GTT GTT CCG ATT C-3'; BSP, 5'-GGA AGA GGA GAC TTC AAA CGA AG-3' and 5'-CAT CCA CTT CTG CTT CTT CGT TC-3'; KLF2, 5'-CTG GCG CCT TCG GTC TTT TC-3' and 5'-CGC ATC CTT CCC AGT TGC AA -3'.

### **Western blotting analysis**

Cultured cells were lysed in extraction buffer (50 mM Tris-HCl [pH 8.0], 150 mM NaCl, 1 mM EDTA, 0.5 % Nonidet P-40, 1 mM PMSF, and a protease inhibitor mixture). Equal amounts of protein were subjected to SDS-PAGE and transferred electrophoretically onto a polyvinylidene difluoride membrane (MilliporeSigma). Membranes were incubated with antibodies against actin (MilliporeSigma), c-Fos, and NFATc1 (Santa Cruz Biotechnology, Dallas, TX, USA). Immune complexes were detected using ECL (MilliporeSigma) and analyzed with a LAS3000 luminescent image analyzer (GE Healthcare, Chicago, IL, USA).

### **Statistical analysis**

Statistical analyses were performed using an unpaired Student's *t* test. All data are presented as the mean  $\pm$  SD. *P* values  $< 0.05$  were considered statistically significant.

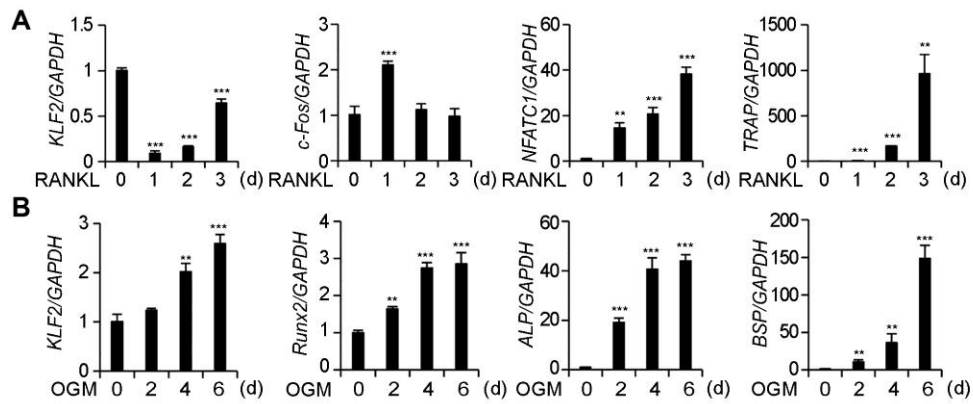

**Supplementary Figure 1**

**Supplementaet Figure 1. Expression profile of KLF2 in osteoclastogenesis and Osteoblastogenesis.** (A) Bone marrow-derived macrophage cells (BMMs) were cultured with M-CSF and RANKL for the indicated length of time. The mRNA levels of KLF2, c-Fos, NFATc1, and TRAP were assessed by real-time PCR. (B) Osteoblasts were cultured with osteogenic medium (OGM) containing BMP2 (100 ng/ml), ascorbic acid (50 µg/ml), and β-glycerophosphate (100 mM) for the indicated length of time. The mRNA expression of KLF2, Runx2, ALP, and BSP was assessed by real-time PCR. (B-D) Osteoblasts were transduced with either pMX-IRES-EGFP (control) or KLF2 retroviruses and cultured in an osteogenic medium.
